# Supplementary material for: Subtle structural changes in octupolar merocyanine dyes influence the photosensitized production of singlet oxygen
Source: Royal Society of Chemistry journal article supplement (doi:10.1039/c5pp00080g), 2015-04-29

## SUPPLEMENTARY INFORMATION

### Subtle Structural Changes in Octupolar Merocyanine Dyes Influence the Photosensitized Production of Singlet Oxygen

Mikkel Bregnhøj,<sup>a</sup> Frederico M. Pimenta,<sup>a</sup> Yevgen M. Poronik,<sup>b</sup> Daniel T. Gryko,<sup>\*b</sup> and Peter  
R. Ogilby<sup>\*a</sup>

<sup>a</sup> Center for Oxygen Microscopy and Imaging, Department of Chemistry, Aarhus University,  
Aarhus, 8000 Denmark. E-mail: [progilby@chem.au.dk](mailto:progilby@chem.au.dk)

<sup>b</sup> Institute of Organic Chemistry of the Polish Academy of Sciences, 01-224 Warsaw, Poland.  
E-mail: [dtgryko@icho.edu.pl](mailto:dtgryko@icho.edu.pl)

#### Contents:

|                                                                                                                       |             |
|-----------------------------------------------------------------------------------------------------------------------|-------------|
| <sup>1</sup> H and <sup>13</sup> C NMR spectra for merocyanine dyes <b>1<sub>but</sub></b> and <b>2<sub>met</sub></b> | pages S2-S5 |
| 2D NOESY experiment for <b>1<sub>but</sub></b>                                                                        | pages S6-S7 |
| Crystal Structure for <b>1<sub>met</sub></b>                                                                          | page S8     |

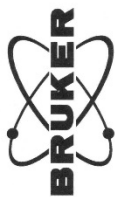

Current Data Parameters  
NAME ZEF138-new  
EXPNO 1  
PROCNO 1

F2 - Acquisition Parameters  
Date\_ 20140304  
Time 15.43  
PROBHD 5 mm TBI 1H/13  
PULPROG zgpg30  
TD 65536  
SOLVENT CDCl3  
NS 64  
DS 0  
SWH 10330.578 Hz  
FIDRES 0.157632 Hz  
AQ 3.171993 sec  
RG 327  
DM 48.400 usec  
DE 6.78 usec  
TE 303.0 K  
D1 1.0000000 sec  
TDO 1

===== CHANNEL f1 =====  
NUC1 13C  
P1 8.20 usec  
PL1 5.00 dB  
SFO1 500.1330685 MHz

F2 - Processing parameters  
SI 32768  
SF 500.1300261 MHz  
WDW no  
SSB 0  
LB 0 Hz  
GB 0  
PC 1.00

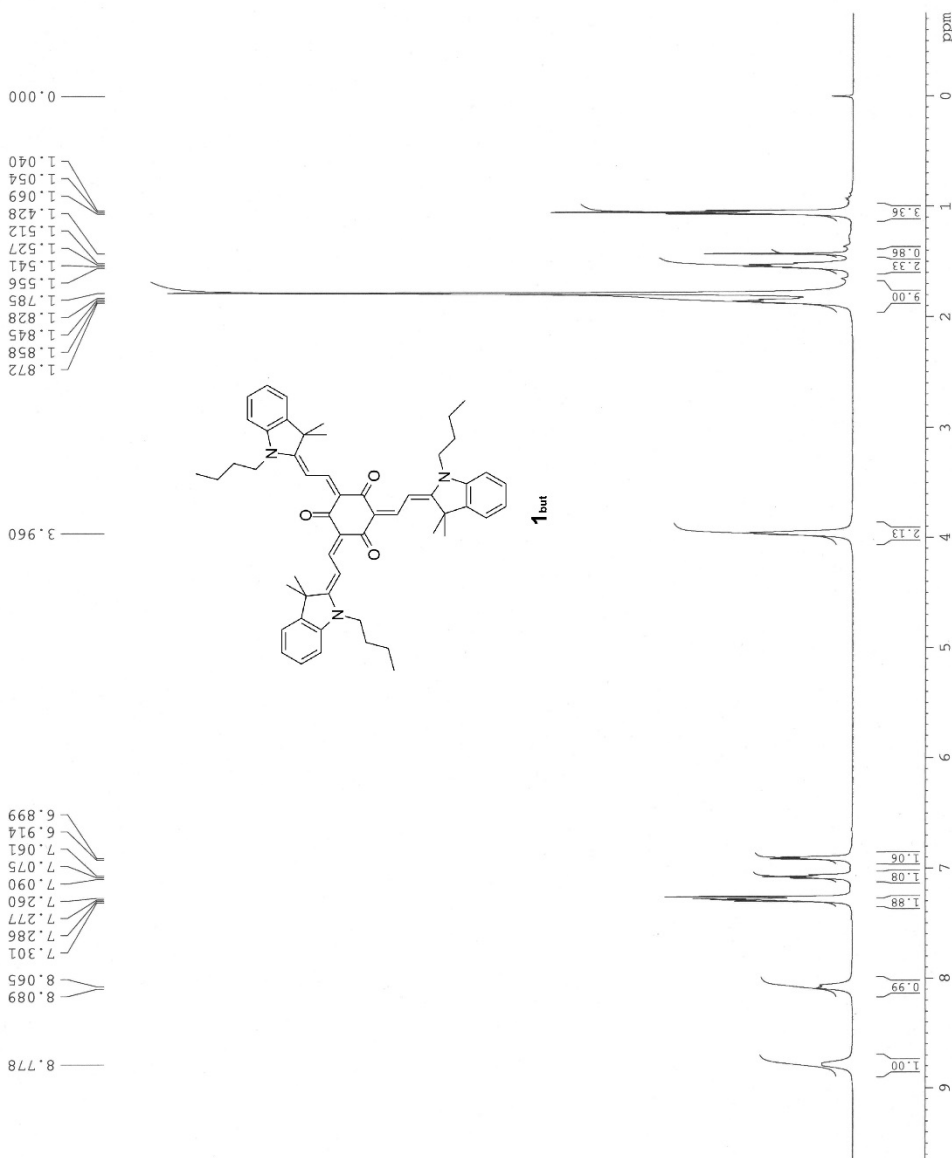

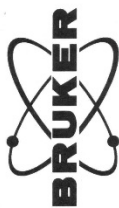

```

Current Data Parameters
NAME      ZFE138-new
EXPNO     2
PROCNO    1

F2 - Acquisition Parameters
Date_     20140304
Time      15:56
INSTRUM   DRX
PROBHD    5 mm TEI 1H/13
PULPROG   zgpg30
TD         65536
SOLVENT    CDCl3
NS         31000
DS         4
SWH         32679.73 Hz
FIDRES     0.498653 Hz
AQ         1.0027508 sec
RG         32768
DW         15.300 usec
DE         7.10 usec
TE         303.10 K
D1         1.0000000 sec
d11        0.0300000 sec
DELTA      0.89999998 sec
TD0        1

===== CHANNEL f1 =====
NUC1       13C
P1         5.00 usec
PL1        3.00 dB
SFO1       125.7703643 MHz

===== CHANNEL f2 =====
CPDPRG2    waltz16
NUC2       1H
PCPD2      98.00 usec
PL2         3.00 dB
PL12        23.00 dB
PL13        32.00 dB
SFO2       500.1320005 MHz

F1 - Acquisition parameters
ND0         1
TD          128
SFO1        500.132 MHz
FIDRES      7.812500 Hz
AQC         1.0000000 sec
PQ         0
PC          1.40

F2 - Processing parameters
SI          262144
SF          125.7577941 MHz
RG          0
SSB         0
LB          0.50 Hz
GB          0
PC          1.40

F1 - Processing parameters
SI          1024
MC2         QF
SF          500.1300000 MHz
RG          0
SSB         0
LB          0.30 Hz
GB          0.1
  
```

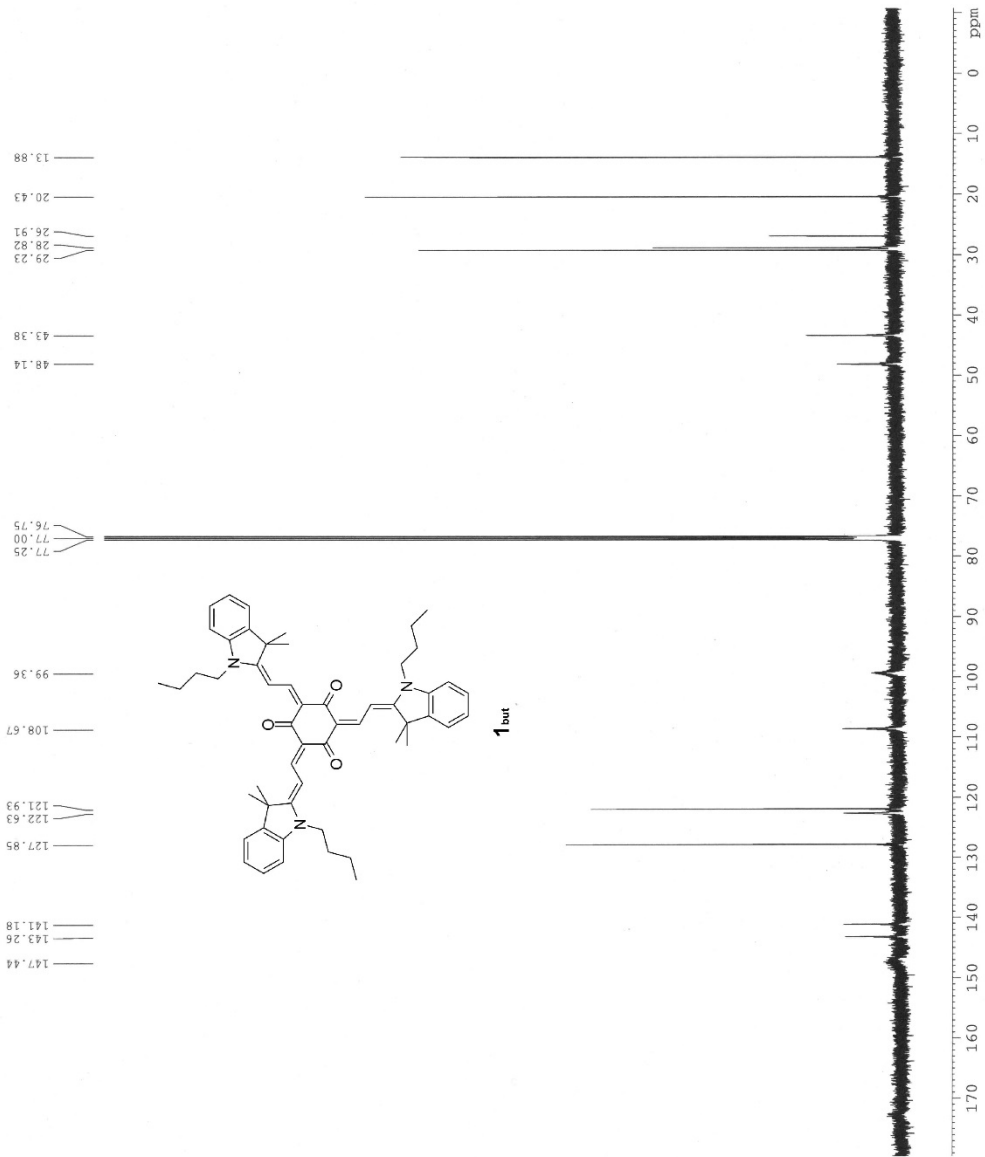

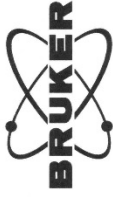

Current Data Parameters  
 NAME EF75A  
 EXPNO 1  
 PROCNO 1

F2 - Acquisition Parameters  
 Date\_ 20140305  
 Time\_ 10.21  
 INSTRUM 5 mm TBI 1H/13  
 PULPROG zgpg30  
 TD 65536  
 SOLVENT DMSO  
 NS 64  
 DS 0  
 SWH 10330.578 Hz  
 FIDRES 0.157632 Hz  
 AQ 3.171973 sec  
 RG 327.4  
 DM 48.400 usec  
 DE 6.78 usec  
 TE 303.0 K  
 D1 1.0000000 sec  
 TDO 1

===== CHANNEL f1 =====  
 NUC1 13C  
 P1 8.20 usec  
 PL1 5.00 dB  
 SF01 500.1330885 MHz

F2 - Processing parameters  
 SI 32768  
 SF 500.1300100 MHz  
 MDW no  
 SSB 0  
 LB 0.00 Hz  
 GB 0  
 PC 1.00

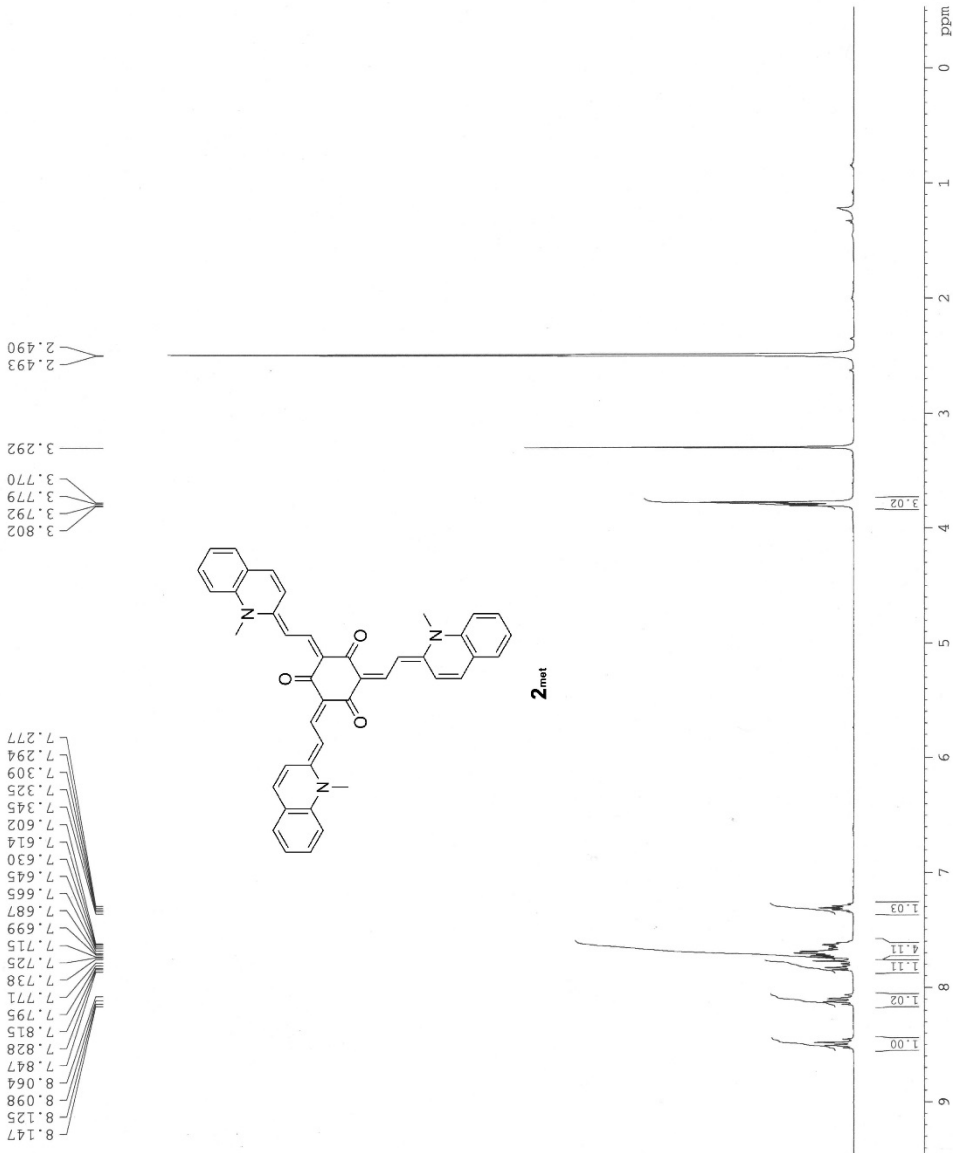

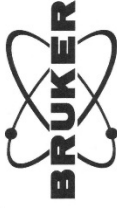

```

Current Data Parameters
=====
NAME      EF752
EXPNO     2
PROCNO    1

F2 - Acquisition Parameters
=====
Date_     20140616
Time      15:31
INSTRUM   DRX
PROBHD    5 mm TBI LH/13
PULPROG   zgpg
TD         65536
AQ        0.00000000
RG         32000
DS         4
SMH        32679.738 Hz
FIDRES     0.498653 Hz
AQ         1.00000000 sec
RG         32768
DS         4
DE         15.300 usec
TE         7.10 usec
TE        303.0 K
TD         131072
DELTA     0.03000000 sec
DELTA     0.89599998 sec
TD0       1

===== CHANNEL f1 =====
NUC1      13
P1         5.00 usec
PL1       -3.00 dB
SFO1      125.7703643 MHz

===== CHANNEL f2 =====
CPDPRG2   waltz16
NUC2       1H
PCPD2     98.00 usec
PL2       3.00 dB
PL12      3.00 dB
PL13      32.00 dB
SFO2      500.1320005 MHz

F1 - Acquisition parameters
=====
TD0       128
SFO1      500.132 MHz
FIDRES     7.812500 Hz
SW         1.999 EPM
FMODE     QF

F2 - Processing parameters
=====
SI         262144
SF         125.7578568 MHz
WDW        EM
SSB        0
GB         0
PC         1.40

F1 - Processing parameters
=====
SI         1024
MC2       OF
SF         500.1300000 MHz
WDW        SINE
SSB        0
GB         0.30 Hz
          0.1
  
```

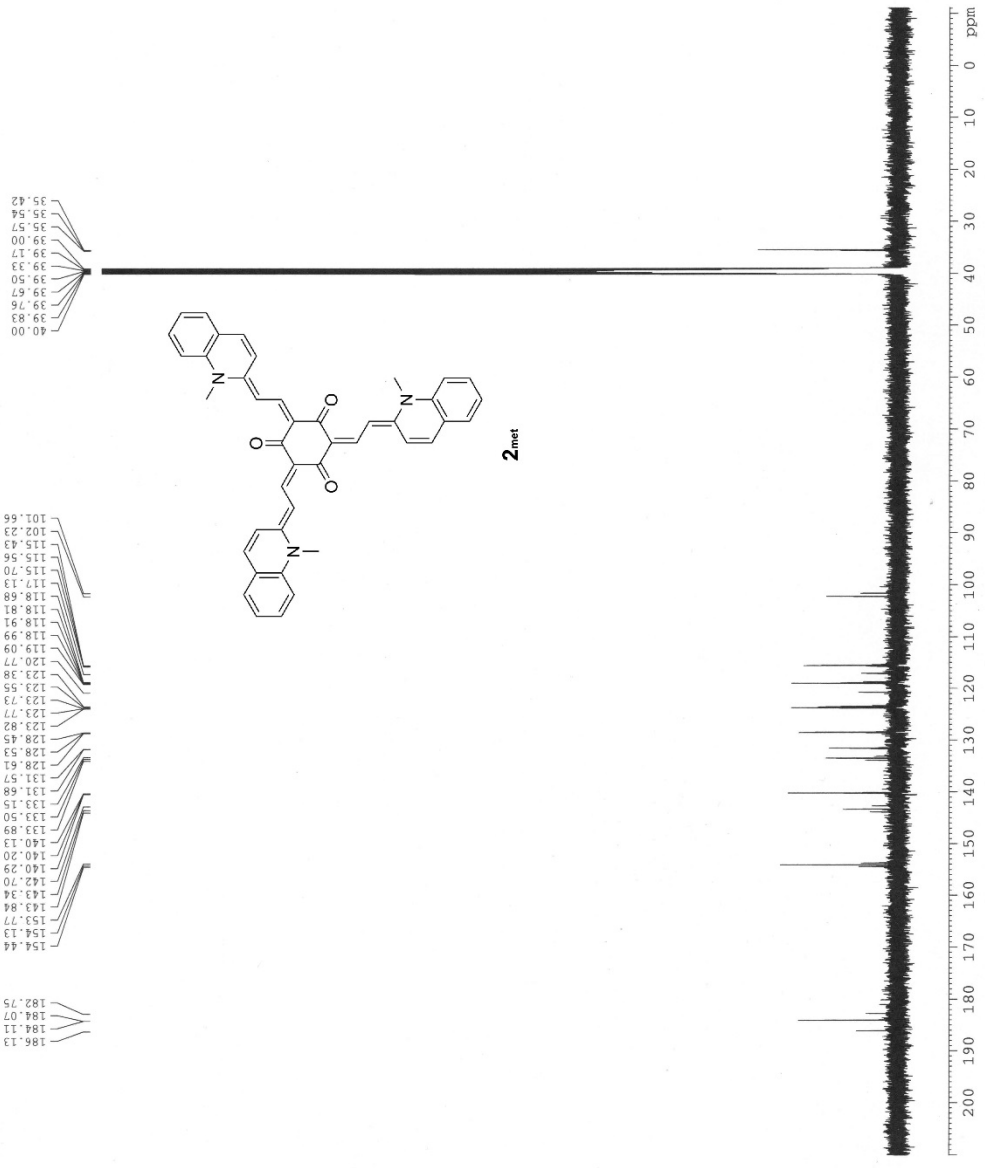

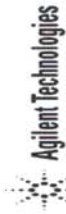

E. Foronik  
zesp10/Var600/2EP-138K/2EP-138K  
HI  
zesp10/Var600/2EP-138K/2EP-138K  
HI

Sample Name:  
2EP-138K  
Data Collected on:  
Varian-NMR-vnmrs600  
Archive directory:

Sample directory:  
Fidfile: PROTON

Pulse Sequence: PROTON (s2pul)  
Solvent: cdcl3  
Data collected on: Mar 30 2015

Solvent: cdcl3  
Temp. 25.0 C / 298.1 K  
Operator: vnmr1  
VNMRS-600 "Varian-NMR"

Relax. delay 2.000 sec  
Pulse 90.0 degrees  
Acq. time 4.509 sec  
Width 7267.4 Hz  
16 repetitions  
OBSERVE HI, 599.8350742 MHz  
DATA PROCESSING  
Ft size 65536

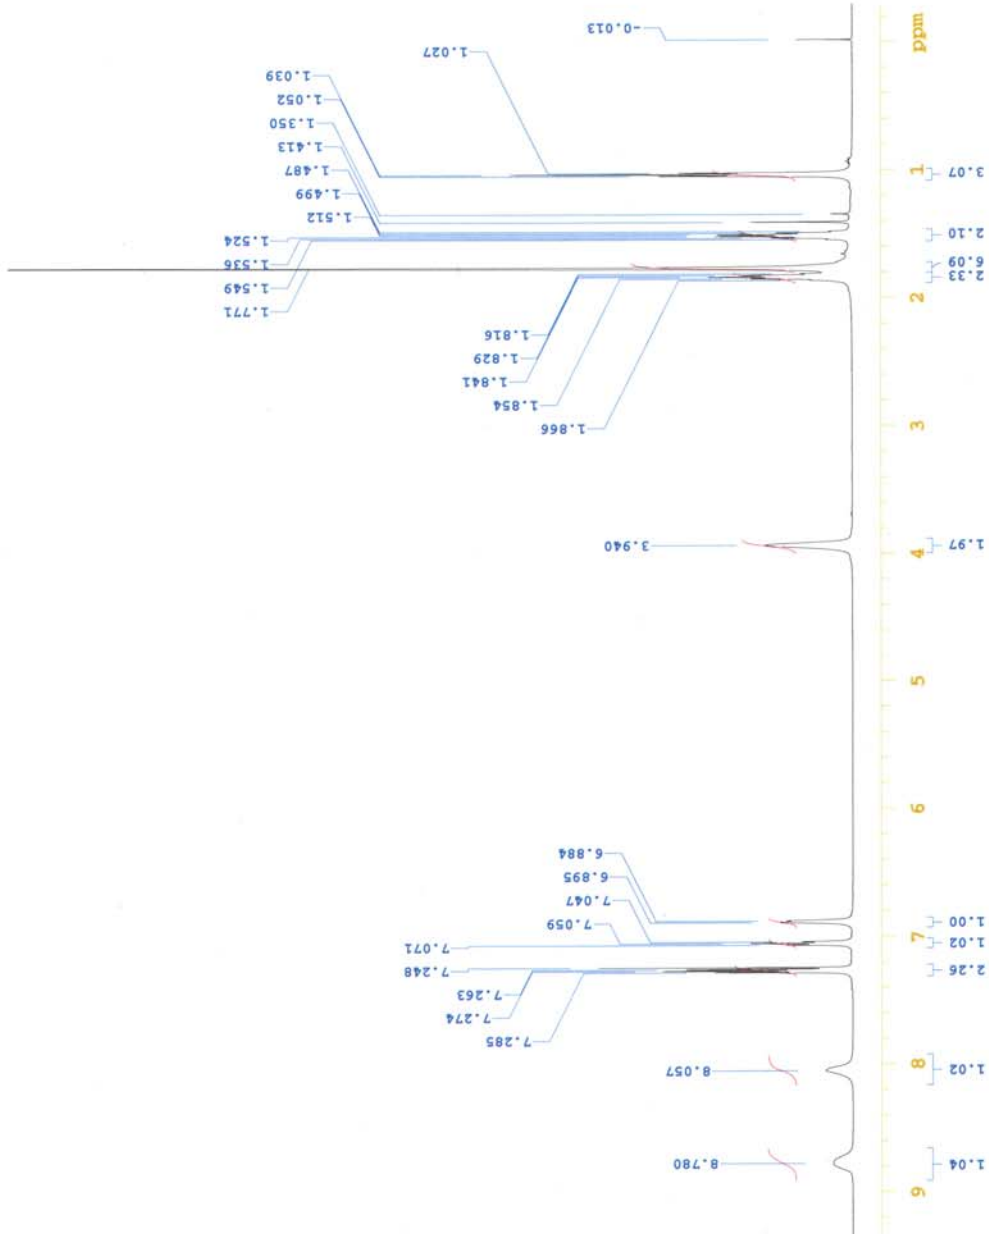

E. Poronik  
zesp10/Var600/2EP-138K/2EP-138K-NOESY

Sample Name:  
2EP-138K  
Data Collected on:  
Varian-NMR-vnars600  
Archive directory:

Sample directory:

File: NOESY

Pulse Sequence: NOESY

Solvent: cdcl3

Data collected on: Mar 30 2015

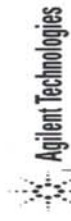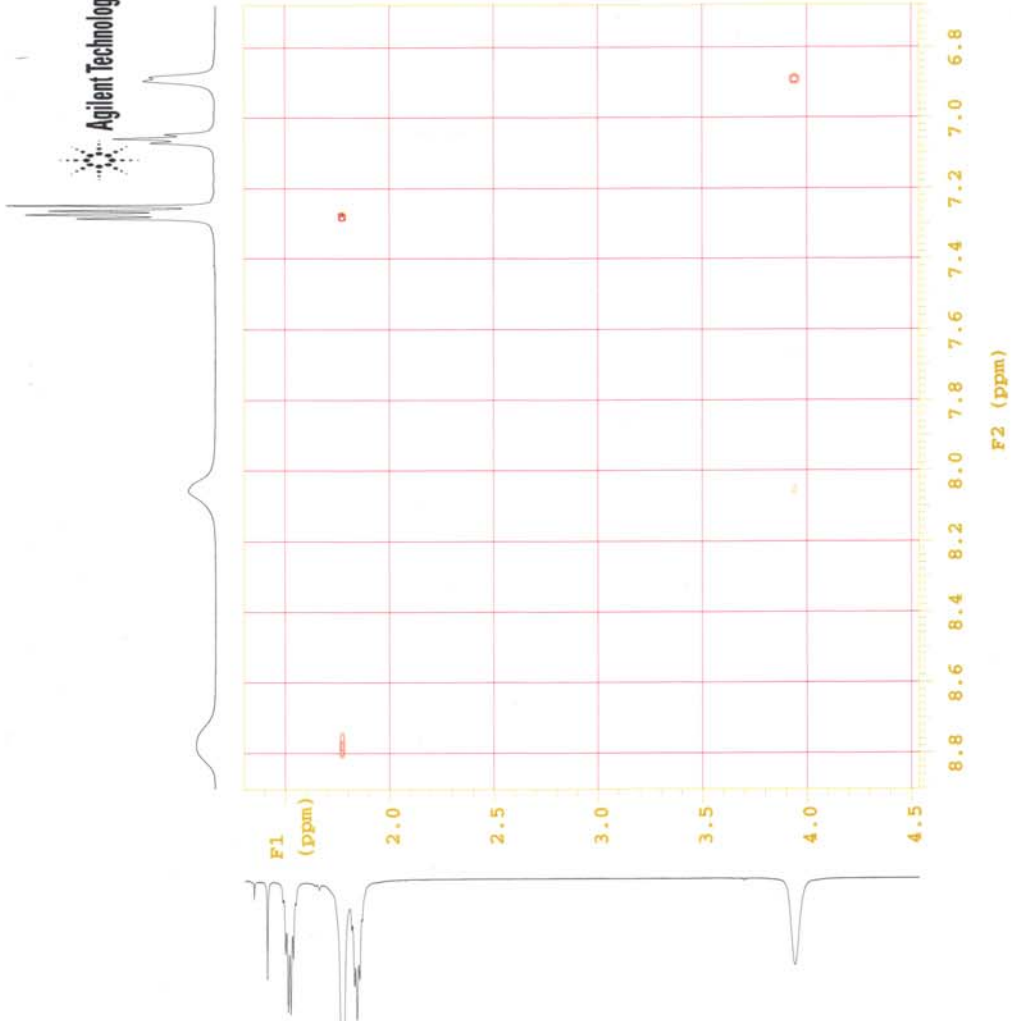

Crystallographic Data for **1<sub>met</sub>**:

X-ray diffraction analysis was performed on **1<sub>met</sub>** (see below). The structure was deposited (CCDC 1057779). It clearly resolves the configuration of double bonds as all-E isomer.

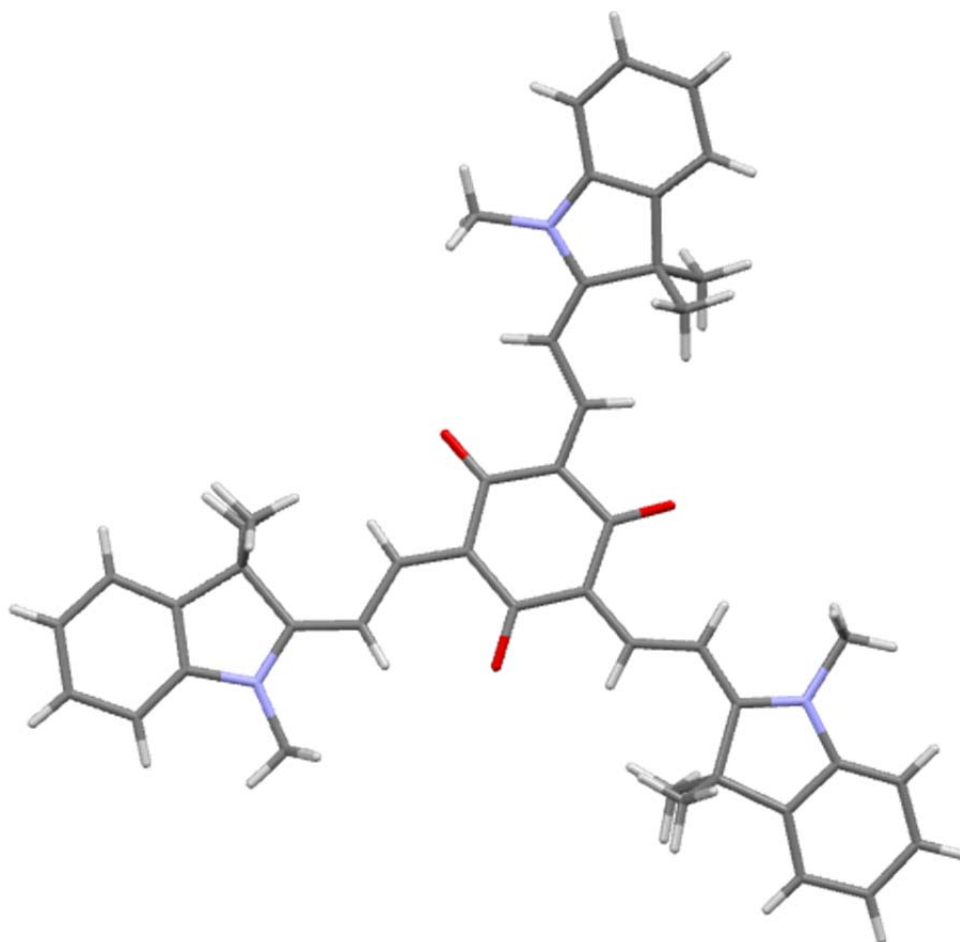

Supplement: c5pp00080g1.pdf [file c5pp00080g1.pdf]
